# Supplementary material for: Specnuezhenide Ameliorates Age-Related Hepatic Lipid Accumulation via Modulating Bile Acid Homeostasis and Gut Microbiota in D-Galactose-Induced Mice
Source: MDPI journal article supplement (doi:10.3390/metabo13080960), 2023-08-18
Supplement: s1 [file s1]

## Supplementary Materials

**Table S1.** MRM parameters for bile acids analysis.

| Compound                   | Abbreviation  | Transition    | Cone | Collision |
|----------------------------|---------------|---------------|------|-----------|
| Cholic acid                | CA            | 407.3 > 343.3 | 160  | 36        |
| Taurocholic acid           | TCA           | 514.3 > 80.0  | 150  | 110       |
| Glycocholic acid           | GCA           | 464.3 > 74.1  | 125  | 36        |
| Taurochenodeoxycholic acid | TCDCA         | 498.3 > 80.0  | 130  | 115       |
| Glycochenodeoxycholic acid | GCDCA         | 448.2 > 74.1  | 125  | 30        |
| Tauroursodeoxycholic acid  | TUDCA         | 498.3 > 80.0  | 120  | 75        |
| Glycoursodeoxycholic acid  | GUDCA         | 448.2 > 74.1  | 120  | 50        |
| $\beta$ -muricholic acid   | $\beta$ -MCA  | 407.3 > 407.3 | 160  | 10        |
| $\alpha$ -muricholic acid  | $\alpha$ -MCA | 407.3 > 407.3 | 150  | 20        |
| Chenodeoxycholic acid      | CDCA          | 391.3 > 391.3 | 145  | 15        |
| Ursodeoxycholic acid       | UDCA          | 391.3 > 391.3 | 155  | 15        |
| Ursocholic acid            | UCA           | 407.3 > 407.3 | 150  | 20        |
| Lithocholic acid           | LCA           | 375.2 > 375.2 | 150  | 10        |
| Deoxycholic acid           | DCA           | 391.3 > 391.3 | 145  | 10        |
| Allocholic acid            | ACA           | 175.1 > 175.1 | 150  | 40        |
| Dehydrocholic acid         | DHCA          | 401.1 > 249.2 | 120  | 40        |
| Taurodeoxycholic acid      | TDCA          | 498.3 > 80.0  | 140  | 105       |
| Hyodeoxycholic acid        | HDCA          | 391.3 > 391.3 | 150  | 10        |
| Glycodeoxycholic acid      | GDCA          | 448.3 > 74.1  | 125  | 42        |
| Taurolithocholic acid      | TLCA          | 482.3 > 80    | 150  | 110       |
| Glycolithocholic acid      | GLCA          | 432.4 > 74.1  | 120  | 68        |

**Table S2.** Primer sequences for RT-PCR.

| Gene    | Forward (5'-3')           | Reverse (5'-3')           |
|---------|---------------------------|---------------------------|
| CYP7A1  | AGGTCTCTGAACTGATCCGTCTACG | GCGTCTTAGCCTTCTCCATGTCATC |
| CYP27A1 | CACCGATGGCTGAGGAAGAAAGAG  | ACCCAGGCAAGACCGAACCC      |
| CYP7B1  | GCCTCTCTAGCAAACACCATTCAG  | AATTTCTGTCACGCAGGGCTTCC   |
| CYP8B1  | ACACCAAGGACAAGCAGCAAGAC   | TGGCTCACTTCCACCCACTCC     |
| GAPDH   | GGCAAATTCAACGGCACAGTCAAG  | TCGCTCCTGGAAGATGGTGATGG   |

**Table S3.** Linear equation and limit of detection (LOD) of bile acid in serum, liver and feces.

| Compound | Linear Equation      | SE (Slope / Intercept) | R <sup>2</sup> | LOD (μmol/L) |
|----------|----------------------|------------------------|----------------|--------------|
| CA       | $y = 31.39x - 10.11$ | 0.05 / 0.06            | 0.994          | 2.94         |
| TCA      | $y = 33.48x - 11.16$ | 0.05 / 0.07            | 0.9999         | 2.62         |
| GCA      | $y = 13.36x - 3.79$  | 0.04 / 0.06            | 0.9998         | 2.30         |
| TCDCA    | $y = 31.95x - 5.50$  | 0.04 / 0.06            | 0.9994         | 2.62         |
| GCDCA    | $y = 12.95x - 0.11$  | 0.11 / 0.05            | 0.9999         | 1.83         |
| TUDCA    | $y = 10.11x - 3.35$  | 0.08 / 0.06            | 0.996          | 1.43         |
| GUDCA    | $y = 25.48x - 7.24$  | 0.14 / 0.11            | 0.998          | 3.02         |
| β-MCA    | $y = 7.359x - 1.24$  | 0.07 / 0.04            | 0.992          | 1.90         |
| α-MCA    | $y = 6.714x - 0.91$  | 0.04 / 0.05            | 0.9992         | 1.90         |
| CDCA     | $y = 8.808x + 0.33$  | 0.06 / 0.06            | 0.995          | 3.25         |
| UDCA     | $y = 13.56x - 2.18$  | 0.08 / 0.03            | 0.997          | 2.86         |
| UCA      | $y = 8.968x - 1.31$  | 0.06 / 0.06            | 0.9999         | 2.30         |
| LCA      | $y = 9.703x - 2.14$  | 0.08 / 0.04            | 0.998          | 2.14         |
| DCA      | $y = 5.911x + 0.98$  | 0.06 / 0.04            | 0.997          | 2.86         |
| ACA      | $y = 244.9x - 96.19$ | 0.06 / 0.06            | 0.9994         | 4.52         |
| DHCA     | $y = 50.27x - 16.32$ | 0.04 / 0.13            | 0.991          | 3.33         |
| TDCA     | $y = 7.098x - 1.07$  | 0.07 / 0.05            | 0.9995         | 2.30         |
| HDCA     | $y = 6.059x + 2.08$  | 0.05 / 0.12            | 0.9994         | 3.25         |
| GDCA     | $y = 4.240x + 0.03$  | 0.08 / 0.01            | 0.9996         | 2.38         |
| TLCA     | $y = 7.778x - 5.93$  | 0.02 / 0.07            | 0.993          | 2.22         |
| GLCA     | $y = 8.592x - 2.05$  | 0.03 / 0.06            | 0.992          | 1.43         |

Note: Correlation Coefficient (R<sup>2</sup>), Standard Error (SE).

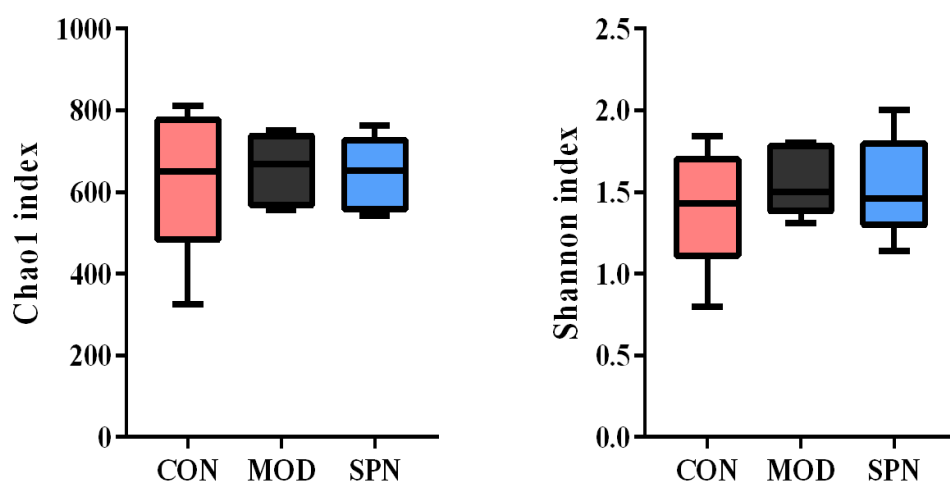**Figure S1.** Microbial richness and diversity of different groups based on the Chao1 index and the Shannon index.

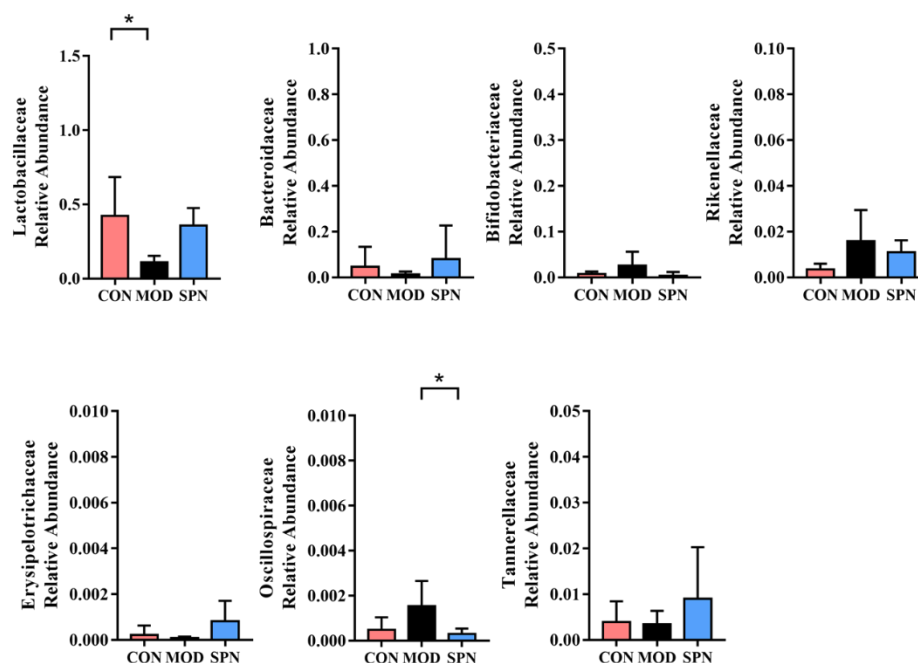

**Figure S2.** The relative abundance of OTUs at the family levels in the gut microbiota ( $n = 5$ ). Data are expressed as the mean  $\pm$  SD. \*:  $P < 0.05$  compared with the MOD group.

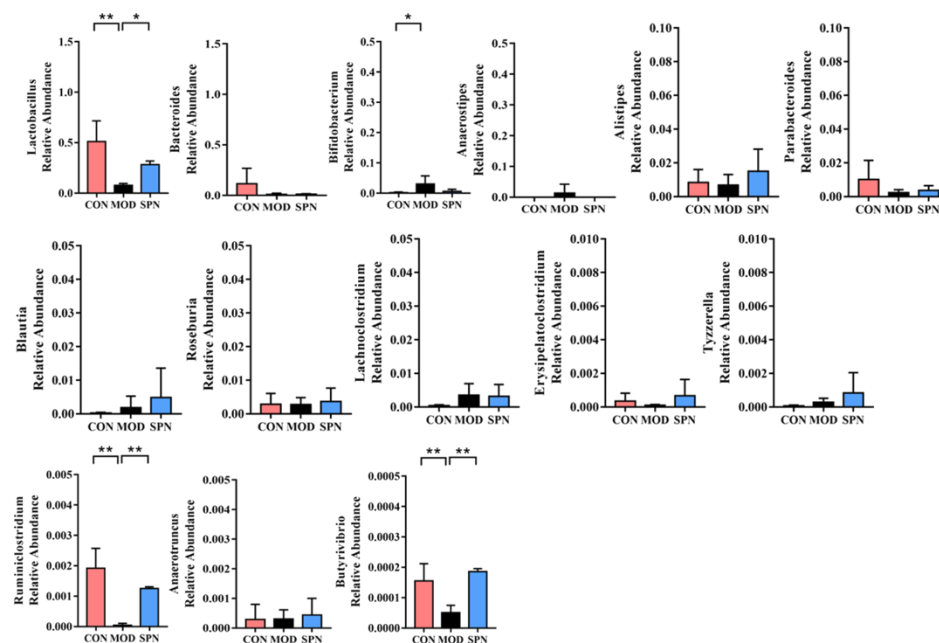

**Figure S3.** The relative abundance of OTUs at the genera levels in the gut microbiota ( $n = 5$ ). Data are expressed as the mean  $\pm$  SD. \*:  $P < 0.05$ , \*\*:  $P < 0.01$  compared with the MOD group.
